# Supplementary material for: Oligoetherols and polyurethane foams obtained from metasilicic acid
Source: Springer Nature journal article supplement (doi:10.1007/s00289-017-2109-9), 2017-07-06
Supplement: MOESM1 [file 13280986]

Supplementary materials


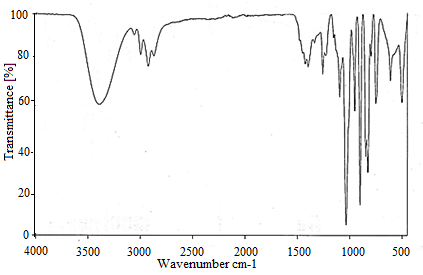


Fig. S.1. IR spectrum of GL


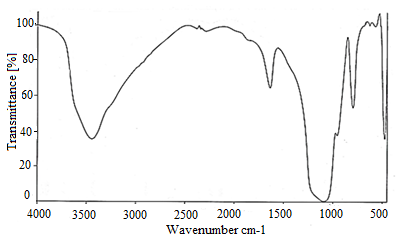


Fig. S. 2. IR spectrum of MSA

**
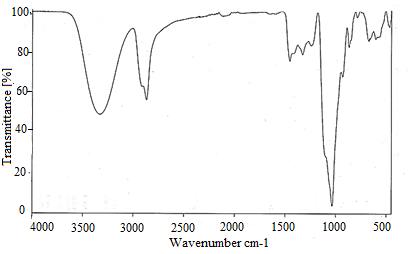
**

Fig. S. 3. IR spectrum of semiproduct obtained from H2SiO3 : GL 1:4 molar ratio system


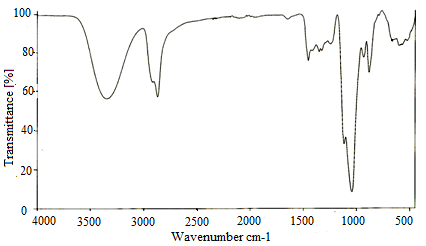


Fig. S. 4. IR spectrum of oligoetherols obtained from H2SiO3 : GL : EC = 1: 4 : 3 molar ratio system

**
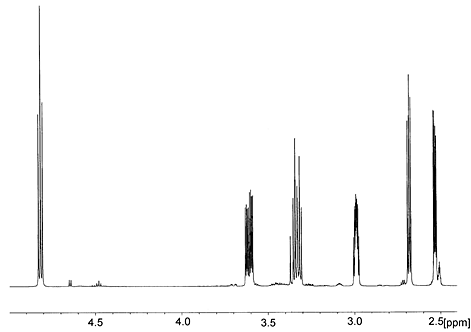
**

Fig. S. 5. 1H-NMR spectrum of GL


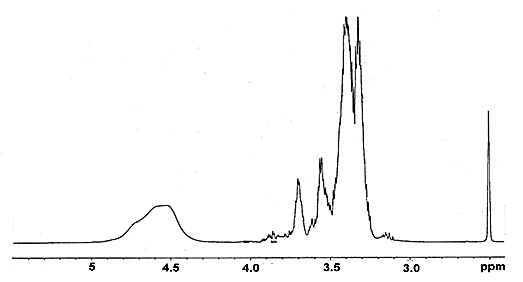


Fig. S. 6. H-NMR spectrum of semiproduct obtained from H2SiO3 : GL = 1:4 molar ratio system


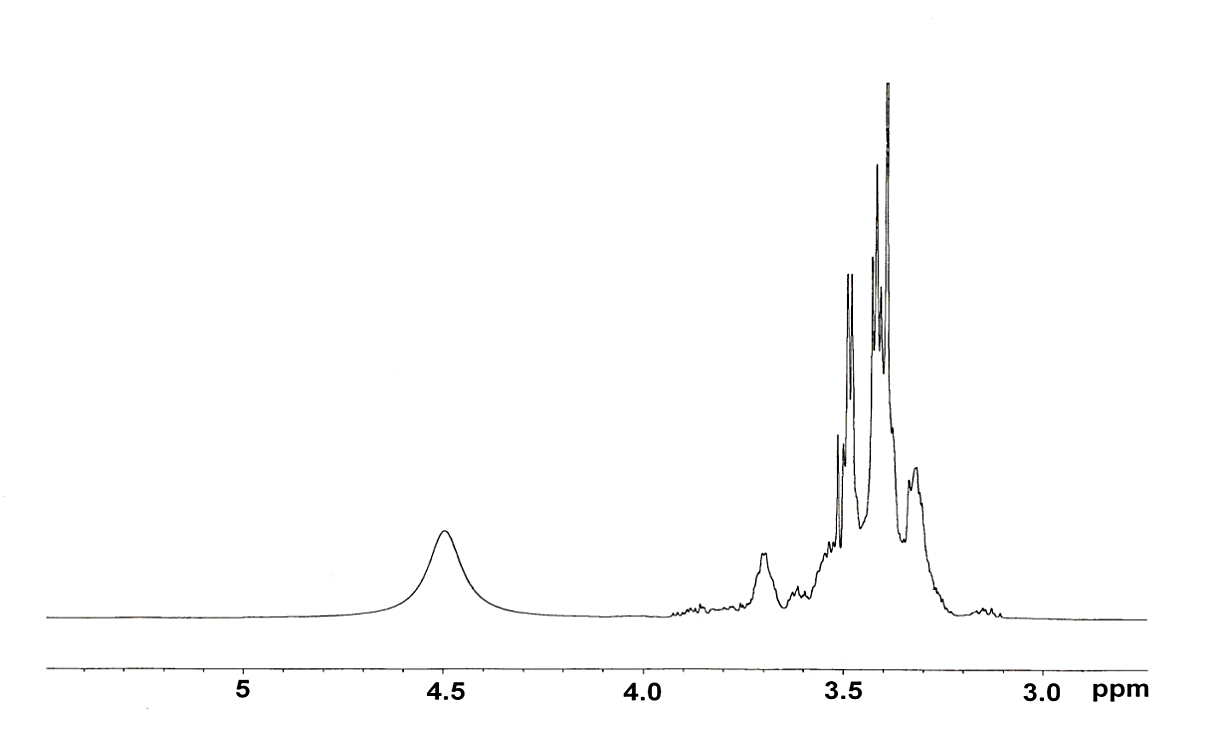


Fig. S. 7. 1H-NMR spectrum of oligoetherol obtained from H2SiO3 : GL : EC =1: 4 : 3 molar ratio system


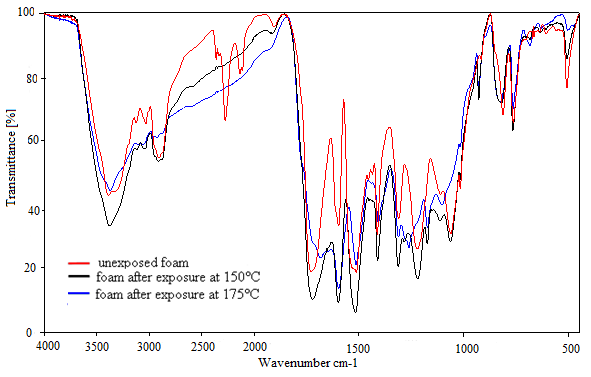


Fig. S. 8. The IR spectrum of the PUF No 10 ( in Table 4) before and after exposure in temperature 150 and 175 0C
